# Supplementary material for: Alternative splicing at neuroligin site A regulates glycan interaction and synaptogenic activity
Source: eLife. 2020 Sep 11;9:e58668. doi: 10.7554/eLife.58668 (PMC7486126; doi:10.7554/eLife.58668)
Supplement: Figure 2—source data 1. [file elife-58668-fig2-data1.xlsx]

## Sheet:  
	Neurexin (AU/mm2)					Surface Myc-NL1 (AU)
	NL1 -A	NL1 +A1	NL1 +A2	NL1 +A1A2		NL1 -A	NL1 +A1	NL1 +A2	NL1 +A1A2
	16.6485	16.141	1.81484	9.88322		10.7755	10.0739	7.545	9.60737
	17.5856	17.7948	5.27451	13.9519		8.04258	5.58018	8.54043	7.31546
	5.8824	5.72433	6.50042	5.03534		10.6209	4.98777	6.74569	7.4482
	4.22188	6.74769	10.9741	13.8724		8.43557	13.0711	6.86275	10.1649
	11.8297	7.85388	4.3041	5.69841		14.0521	12.7242	7.01444	8.99182
	5.56432	29.4518	11.2659	4.45425		7.92437	14.5598	11.0204	9.12906
	10.6138	4.64269	3.39464	10.7914		7.17823	7.46677	8.63678	13.1747
	3.94282	15.6306	4.96021	23.514		8.50131	7.21667	19.6749	13.2349
	26.5745	17.9085	1.79581	20.859		15.8606	8.64021	10.3186	11.6372
	16.1307	9.15128	16.0866	37.3517		12.0341	6.73902	8.86575	15.6855
	10.6881	21.4079	10.5622	13.0081		18.1439	12.5751	23.0111	7.37899
	1.74418	25.8206	14.5789	2.76724		5.67313	8.91636	11.328	4.82487
	3.2801	9.22748	22.3294	7.18149		6.1969	9.02648	5.17305	9.23824
	0.885083	5.99206	38.9317	2.4157		2.36001	12.179	7.49389	9.10576
	19.4359	37.887	6.48446	23.577		7.83497	8.80543	4.78563	9.07871
	11.7285	25.6989	12.935	82.1565		5.5368	7.4525	12.9888	6.11281
	5.35678	15.5577	18.6721	28.0627		9.95712	8.60828	3.07513	7.50228
	4.55488	18.3545	22.0295	3.83463		8.97204	16.7522	5.16663	5.17992
	26.5877	15.551	6.44343	29.1609		11.0163	8.24872	6.19163	6.27494
	7.00258	27.2331	12.9019	21.9823		10.5897	9.17145	6.32299	6.56865
	9.86248	22.3535	12.4788	11.5711		10.468	8.60148	8.05462	10.6111
	7.25329	5.38282	8.23533	21.9126		10.4893	9.2283	14.446	12.75
	2.12237	22.6667	12.7795	37.8398		6.54518	9.36666	7.24374	12.4046
	12.3207	4.81699	12.9295	5.96725		7.45051	10.3195	5.00941	6.53412
	4.01492	14.2681	12.878	7.89303		9.70035	8.01339	11.8369	10.088
	19.0828	14.8346	21.7579	32.8842		13.0119	7.84829	14.2295	9.15205
	2.89107	19.7525	7.13036	5.33929		9.63839	7.10833	11.6036	12.6839
	9.15762	19.3884	7.0445	21.0793		8.14734	9.85133	7.99333	15.2906
	2.44004	48.4648	5.72693	7.44715		11.06	12.7356	15.1871	10.767
	7.72054	17.9385	16.1437	46.1795		9.23879	7.09599	9.26736	9.16342
	12.9042	6.90282	11.8756	58.7293		8.26307	6.52294	13.5699	7.42062
	14.24	11.5356	2.133	18.3972		11.6753	7.7041	5.81154	6.42946
	5.24362	4.7632	22.4002	56.0949		9.8228	8.39362	11.3217	12.316
	0.810915	22.9953	20.0909	45.5064		9.06105	12.0624	6.76277	8.84139
	41.4084	15.594	8.73698	19.238		10.8683	13.2868	5.26983	10.2975
		33.4944	2.96793	33.829			11.8742	7.54536	5.87447
		19.9151	12.4838	22.1973			10.4912	9.73308	16.3425
		15.251	29.2907	5.06092			12.4156	11.3965	6.77434
		26.4663	33.4446				9.46046	7.55613
			6.09709					18.3306
			10.1788					12.2582
			7.48158					6.89364
			14.5688					11.1603
Mean	10.3352	17.4503	12.351	21.4927		9.57561	9.61988	9.6103	9.5104

## Sheet: Sheet1
	Neurexin (AU/mm2)					Surface Myc-NL1 (AU)
	NL1 -A	NL1 +A1	NL1 +A2	NL1 +A1A2		NL1 -A	NL1 +A1	NL1 +A2	NL1 +A1A2
	16.6411	16.1339	1.81403	9.87883		10.7788	10.0769	7.54731	9.61031
	17.5778	17.7869	5.27217	13.9457		8.04505	5.58189	8.54304	7.3177
	5.87978	5.72178	6.49753	5.03311		10.6242	4.9893	6.74776	7.45049
	4.22	6.74469	10.9693	13.8662		8.43815	13.0751	6.86485	10.168
	11.8245	7.85039	4.30219	5.69588		14.0564	12.7281	7.01659	8.99457
	5.56185	29.4388	11.2608	4.45227		7.9268	14.5643	11.0238	9.13186
	10.6091	4.64063	3.39313	10.7867		7.18043	7.46906	8.63943	13.1787
	3.94107	15.6237	4.95801	23.5035		8.50392	7.21888	19.681	13.2389
	26.5627	17.9005	1.79502	20.8498		15.8654	8.64286	10.3218	11.6407
	16.1235	9.14721	16.0795	37.3351		12.0378	6.74108	8.86846	15.6903
	10.6833	21.3984	10.5575	13.0023		18.1495	12.5789	23.0181	7.38125
	1.7434	25.8091	14.5724	2.76602		5.67487	8.91909	11.3315	4.82634
	3.27864	9.22338	22.3195	7.1783		6.19879	9.02925	5.17464	9.24107
	0.88469	5.9894	38.9144	2.41462		2.36073	12.1827	7.49619	9.10855
	19.4273	37.8701	6.48158	23.5665		7.83737	8.80813	4.7871	9.0815
	11.7233	25.6875	12.9292	82.12		5.53849	7.45478	12.9928	6.11468
	5.3544	15.5508	18.6638	28.0502		9.96017	8.61091	3.07607	7.50458
	4.55286	18.3464	22.0197	3.83292		8.97479	16.7573	5.16821	5.1815
	26.5759	15.5441	6.44057	29.1479		11.0197	8.25125	6.19353	6.27686
	6.99947	27.221	12.8961	21.9725		10.5929	9.17426	6.32493	6.57067
	9.8581	22.3436	12.4733	11.566		10.4712	8.60411	8.05709	10.6144
	7.25007	5.38043	8.23167	21.9028		10.4925	9.23113	14.4504	12.7539
	2.12143	22.6566	12.7738	37.823		6.54719	9.36953	7.24596	12.4084
	12.3152	4.81485	12.9238	5.9646		7.4528	10.3226	5.01094	6.53612
	4.01314	14.2618	12.8723	7.88953		9.70332	8.01584	11.8406	10.0911
	19.0743	14.828	21.7482	32.8696		13.0158	7.85069	14.2339	9.15485
	2.88979	19.7438	7.12719	5.33692		9.64135	7.11051	11.6071	12.6878
	9.15355	19.3798	7.04138	21.0699		8.14983	9.85435	7.99578	15.2953
	2.43896	48.4432	5.72439	7.44384		11.0634	12.7395	15.1917	10.7703
	7.71711	17.9305	16.1365	46.159		9.24162	7.09816	9.2702	9.16622
	12.8984	6.89976	11.8704	58.7032		8.2656	6.52494	13.574	7.4229
	14.2337	11.5305	2.13206	18.3891		11.6789	7.70646	5.81332	6.43143
	5.24129	4.76109	22.3902	56.07		9.82581	8.39619	11.3252	12.3197
	0.810555	22.9851	20.082	45.4862		9.06382	12.0661	6.76485	8.8441
	41.3901	15.5871	8.7331	19.2294		10.8716	13.2909	5.27144	10.3006
		33.4795	2.96661	33.814			11.8778	7.54767	5.87627
		19.9063	12.4783	22.1874			10.4944	9.73607	16.3475
		15.2442	29.2777	5.05867			12.4194	11.3999	6.77642
		26.4546	33.4297				9.46336	7.55845
			6.09438					18.3362
			10.1743					12.262
			7.47825					6.89576
			14.5623					11.1637
Mean	10.3306	17.4425	12.3455	21.4832		9.57854	9.62282	9.61324	9.51331
