# Supplementary material for: Alternative splicing at neuroligin site A regulates glycan interaction and synaptogenic activity
Source: eLife. 2020 Sep 11;9:e58668. doi: 10.7554/eLife.58668 (PMC7486126; doi:10.7554/eLife.58668)
Supplement: Figure 5—source data 1. [file elife-58668-fig5-data1.xlsx]

## Sheet:  
	Synapsin (AU/mm2)					Surface Myc-NL1 (AU)
	NL1 -A	NL1 +A1	NL1 +A2	NL1 +A1A2		NL1 -A	NL1 +A1	NL1 +A2	NL1 +A1A2
	1.22927	13.5776	19.3023	3.63998		0.39195	5.3767	4.51407	2.44401
	53.5296	12.0851	9.21779	11.2062		6.81436	1.03975	1.12802	2.11046
	9.45735	10.8682	9.85407	29.3354		3.22213	7.28266	3.17674	1.755
	2.77807	15.5447	8.14603	21.3204		2.36554	4.34871	1.67732	1.18866
	4.77866	9.28179	20.4823	1.54773		2.33778	3.03409	1.04425	2.83383
	7.04197	26.3413	25.7229	13.2321		2.62505	3.01119	3.79301	7.65483
	6.2373	17.3445	7.27237	35.5495		2.64933	3.3105	3.27781	4.17291
	1.99321	9.11249	13.3248	6.94567		5.06263	2.22016	3.87179	1.5659
	30.8507	13.8074	4.09361	9.83499		6.67377	2.53108	4.31398	4.49462
	3.24629	28.2426	8.26322	7.26364		1.83441	3.38353	3.90344	1.10311
	6.15134	13.4688	11.7009	38.1432		3.53519	0.795248	4.25006	6.00404
	10.6259	5.81981	18.0024	55.554		1.50573	2.17884	2.43489	7.14506
	10.9827	5.67066	18.9796	2.47153		1.35727	4.14985	5.35561	2.85344
	9.51479	6.20297	16.5619	12.6005		6.68725	1.96429	2.20029	4.25975
	29.3715	12.179	6.97627	8.85099		3.46983	1.72547	1.3835	3.1785
	15.5646	8.8083	3.49642	3.36207		3.2232	2.31814	1.7684	1.09935
	4.20983	7.5243	18.2121	5.98585		1.02001	3.24776	5.59918	5.70541
	3.34252	20.2406	12.417	11.8637		1.00131	1.69485	3.59663	4.83538
	0.930619	3.96979	25.4414	22.4291		1.64354	3.66235	5.01177	3.56607
	9.95979	15.8954	5.25455	9.40686		2.4442	2.05277	1.35892	3.19388
	4.69263	13.8499	2.42869	7.4005		3.96876	1.68176	2.14296	0.899659
	12.9218	7.06993	11.7456	19.5698		5.5289	2.54731	4.61028	1.68752
	13.8551	5.11409	7.9772	20.6066		3.26452	3.22344	3.00394	1.71534
	16.0974	6.07413	21.1557	29.6472		3.25552	2.15772	3.021	3.15832
	2.65405	6.03456	1.47242	9.31327		3.70773	2.53085	1.93511	1.05459
	7.55197	37.3602	11.8244	30.8061		2.7325	4.81572	4.81621	1.42134
	37.3271	18.1398	4.45975	16.1191		4.30652	4.63805	3.38425	0.737949
	8.26296	10.4237	3.47218	16.64		3.13043	2.08089	2.64282	3.3423
	7.11966	13.4014	18.8876	7.1473		2.31959	2.24818	4.3094	4.95433
	15.508	12.1047	3.06598	26.5419		4.07832	4.0641	1.50348	3.86736
	5.46709	4.90365	12.5192	10.591		4.14521	4.38568	2.60222	3.43134
	6.55942	11.3239	12.3545	17.5173		3.35502	2.64669	2.26434	4.2977
	7.34264	11.2045	9.33605	40.2247		3.01922	1.9831	3.54732	3.63565
	11.0745	10.8188	23.4785	18.5475		2.94824	3.69794	3.614	4.47617
	6.58702	33.3459	13.3502	21.2503		2.55403	5.79683	4.04543	3.04626
	5.69822	23.4136	10.2236	6.70108		2.41317	4.80718	2.86789	4.26192
	18.7825	23.0624	9.06169	17.627		4.43075	4.18495	3.94659	4.7757
	4.16788	4.43998	13.9599	19.1541		1.95377	2.73926	3.32242	5.7382
	22.8432	28.9683	15.1079	16.2836		5.06479	3.11359	2.36362	2.02936
	12.8792	21.5134	7.93134	19.9053		5.0165	2.01706	4.48791	1.69301
	12.1119	14.1365	2.96029	13.1291		2.29542	3.94953	2.17064	4.52664
	2.20981	66.8357	4.52136	6.5321		2.69352	7.467	2.12246	1.76137
	7.60633	34.2026	6.87341	19.1258		2.21569	2.70177	4.83529	3.6247
	8.74843	10.1967	7.02795	20.763		2.47223	1.99908	2.41457	2.21632
	4.80327	18.5318	4.53252	11.4652		3.46646	3.30529	3.27421	3.82559
	13.1247	9.49051	10.5876	2.60869		3.2187	1.93222	3.77889	1.48272
	13.5993	60.001	5.53843			2.20908	4.23411	3.32274
		13.5815	2.67048				3.23735	2.43208
		13.5061	5.22541				2.17362	2.54317
		9.8167	20.7986				1.71486	4.43587
		18.2339	5.55805				3.28216	2.90077
		9.8938	10.5664				2.127	2.42828
		8.13412	26.0019				1.28387	3.73575
		9.46996	5.29092				1.6688	2.94821
		20.6951	16.1678				9.67527	5.37491
			4.67064					1.48469
Mean	10.8807	15.9142	10.9915	16.4296		3.1836	3.18982	3.18381	3.23534

## Sheet: Sheet1
	Neurexin (AU/mm2)					Surface Myc-NL1 (AU)
	NL1 -A	NL1 +A1	NL1 +A2	NL1 +A1A2		NL1 -A	NL1 +A1	NL1 +A2	NL1 +A1A2
	16.6411	16.1339	1.81403	9.87883		10.7788	10.0769	7.54731	9.61031
	17.5778	17.7869	5.27217	13.9457		8.04505	5.58189	8.54304	7.3177
	5.87978	5.72178	6.49753	5.03311		10.6242	4.9893	6.74776	7.45049
	4.22	6.74469	10.9693	13.8662		8.43815	13.0751	6.86485	10.168
	11.8245	7.85039	4.30219	5.69588		14.0564	12.7281	7.01659	8.99457
	5.56185	29.4388	11.2608	4.45227		7.9268	14.5643	11.0238	9.13186
	10.6091	4.64063	3.39313	10.7867		7.18043	7.46906	8.63943	13.1787
	3.94107	15.6237	4.95801	23.5035		8.50392	7.21888	19.681	13.2389
	26.5627	17.9005	1.79502	20.8498		15.8654	8.64286	10.3218	11.6407
	16.1235	9.14721	16.0795	37.3351		12.0378	6.74108	8.86846	15.6903
	10.6833	21.3984	10.5575	13.0023		18.1495	12.5789	23.0181	7.38125
	1.7434	25.8091	14.5724	2.76602		5.67487	8.91909	11.3315	4.82634
	3.27864	9.22338	22.3195	7.1783		6.19879	9.02925	5.17464	9.24107
	0.88469	5.9894	38.9144	2.41462		2.36073	12.1827	7.49619	9.10855
	19.4273	37.8701	6.48158	23.5665		7.83737	8.80813	4.7871	9.0815
	11.7233	25.6875	12.9292	82.12		5.53849	7.45478	12.9928	6.11468
	5.3544	15.5508	18.6638	28.0502		9.96017	8.61091	3.07607	7.50458
	4.55286	18.3464	22.0197	3.83292		8.97479	16.7573	5.16821	5.1815
	26.5759	15.5441	6.44057	29.1479		11.0197	8.25125	6.19353	6.27686
	6.99947	27.221	12.8961	21.9725		10.5929	9.17426	6.32493	6.57067
	9.8581	22.3436	12.4733	11.566		10.4712	8.60411	8.05709	10.6144
	7.25007	5.38043	8.23167	21.9028		10.4925	9.23113	14.4504	12.7539
	2.12143	22.6566	12.7738	37.823		6.54719	9.36953	7.24596	12.4084
	12.3152	4.81485	12.9238	5.9646		7.4528	10.3226	5.01094	6.53612
	4.01314	14.2618	12.8723	7.88953		9.70332	8.01584	11.8406	10.0911
	19.0743	14.828	21.7482	32.8696		13.0158	7.85069	14.2339	9.15485
	2.88979	19.7438	7.12719	5.33692		9.64135	7.11051	11.6071	12.6878
	9.15355	19.3798	7.04138	21.0699		8.14983	9.85435	7.99578	15.2953
	2.43896	48.4432	5.72439	7.44384		11.0634	12.7395	15.1917	10.7703
	7.71711	17.9305	16.1365	46.159		9.24162	7.09816	9.2702	9.16622
	12.8984	6.89976	11.8704	58.7032		8.2656	6.52494	13.574	7.4229
	14.2337	11.5305	2.13206	18.3891		11.6789	7.70646	5.81332	6.43143
	5.24129	4.76109	22.3902	56.07		9.82581	8.39619	11.3252	12.3197
	0.810555	22.9851	20.082	45.4862		9.06382	12.0661	6.76485	8.8441
	41.3901	15.5871	8.7331	19.2294		10.8716	13.2909	5.27144	10.3006
		33.4795	2.96661	33.814			11.8778	7.54767	5.87627
		19.9063	12.4783	22.1874			10.4944	9.73607	16.3475
		15.2442	29.2777	5.05867			12.4194	11.3999	6.77642
		26.4546	33.4297				9.46336	7.55845
			6.09438					18.3362
			10.1743					12.262
			7.47825					6.89576
			14.5623					11.1637
Mean	10.3306	17.4425	12.3455	21.4832		9.57854	9.62282	9.61324	9.51331
