# Supplementary material for: Alternative splicing at neuroligin site A regulates glycan interaction and synaptogenic activity
Source: eLife. 2020 Sep 11;9:e58668. doi: 10.7554/eLife.58668 (PMC7486126; doi:10.7554/eLife.58668)
Supplement: Figure 8—source data 1. [file elife-58668-fig8-data1.xlsx]

## Sheet: Fig 8BC
	Synapsin (AU/mm2)				Surface Myc-NL1 (AU)
	NL1 -A	NL1 P89L -A	NL1 P89L +A1		NL1 -A	NL1 P89L -A	NL1 P89L +A1
	23.4623	5.92039	7.63714		0.630186	0.814368	0.301779
	27.8322	4.57256	7.00981		0.659809	0.316826	0.383845
	19.8114	5.74434	19.022		0.613877	0.434572	0.491511
	18.7587	3.42464	10.6586		0.43929	0.581007	0.70201
	9.34043	5.14298	26.2358		0.589494	0.791922	0.865161
	7.37998	4.24474	10.704		0.622986	0.39878	0.426123
	40.1055	4.79131	5.28042		0.691472	0.864071	0.376691
	16.4793	0.452351	27.4267		0.70423	0.296637	0.820807
	49.7596	3.22487	11.4644		0.628109	0.424554	0.805239
	18.059	4.24646	2.6174		0.570719	0.688712	0.295811
	12.6385	1.91077	12.7191		0.459641	0.72048	0.762654
	10.5009	2.25279	4.48967		0.576458	0.702324	0.727592
	3.85459	0.1461	4.40889		0.508464	0.679995	0.495211
	4.03699	3.58125	6.30833		0.653293	0.460613	0.633943
	22.3339	2.17607	14.4517		0.677981	0.763671	0.305463
	57.3617	9.08316	2.87409		0.527295	0.623282	0.74204
	14.0029	2.77176	10.5367		0.603682	0.552758	0.629543
	42.9443	5.35004	5.63125		0.659072	0.638824	0.449509
		8.67504	13.676			0.381509	0.314321
		1.74534	10.9523			0.718169	0.422483
		0	16.1267			0.0834868	0.681936
		3.3714	9.19689			0.57069	0.65049
		7.48893	21.5742			0.735426	0.809782
		5.81174	0.568505			0.719497	0.29934
		0.65316	1.60654			0.515412	0.337491
		1.92033	7.30217			0.607961	0.239704
		3.81954				0.489992
		1.05969				0.325377
		16.1445				0.0946709
Mean	22.1479	4.12849	10.4031		0.600892	0.551572	0.537326
